# Supplementary material for: Role of co-existing anions in non-radical and radical processes of carbocatalyzed persulfate activation for acetaminophen degradation
Source: Royal Society of Chemistry journal article supplement (doi:10.1039/d2ew00441k), 2022-01-01
Supplement: d2ew00441k1.pdf [file d2ew00441k1.pdf]

**Role of co-existing anions in non-radical and radical processes of carbocatalyzed persulfate  
activation for acetaminophen degradation**

Kadarkarai Govindan<sup>a</sup>, Do-Gun Kim<sup>b</sup>, Seok-Oh Ko<sup>a, \*</sup>

<sup>a</sup> Environmental System Laboratory, Department of Civil Engineering, Kyung Hee University-  
Global Campus, 1732 Deogyong-daero, Giheung-Gu, Yongin-Si, Gyeonggi-Do 16705,  
Republic of Korea

<sup>b</sup> Department of Environmental Engineering, Suncheon National University, 255 Jungang-ro,  
Suncheon, Jellanam-do, 57922, Republic of Korea

\* **Corresponding authors:**

Email: [soko@khu.ac.kr](mailto:soko@khu.ac.kr) (Seok-Oh Ko)

## **Text S1. Materials**

Multiwalled carbon nanotubes (MWCNT) with a diameter of 5-15 nm and length of ~10  $\mu\text{m}$  were purchased from Carbon Nano-Materials Technology Co., Ltd., South Korea. Dicyandiamide (99.5%,  $\text{C}_2\text{H}_4\text{N}_4$ ,  $81.08 \text{ g mol}^{-1}$ ) and ethyl alcohol (99.5%,  $\text{C}_2\text{H}_5\text{OH}$ ), were purchased from Sigma Aldrich, South Korea. Potassium persulfate (PS,  $\text{K}_2\text{S}_2\text{O}_8$ ,  $270.32 \text{ g mol}^{-1}$ ), sodium hydroxide ( $\text{NaOH}$ ,  $40 \text{ g mol}^{-1}$ ), sodium chloride ( $\text{NaCl}$ ,  $58.44 \text{ g mol}^{-1}$ ), sodium sulfate ( $\text{Na}_2\text{SO}_4$   $142.04 \text{ g mol}^{-1}$ ), sodium nitrate ( $\text{NaNO}_3$   $84.99 \text{ g mol}^{-1}$ ), sodium carbonate ( $\text{Na}_2\text{CO}_3$ ,  $105.99 \text{ g mol}^{-1}$ ), and sodium bicarbonate ( $\text{NaHCO}_3$ ,  $84.01 \text{ g mol}^{-1}$ ) were received from SamChun Chemicals, South Korea. All chemicals were laboratory grade and were used without further purifications. In addition, HPLC grade methanol (99%,  $\text{CH}_3\text{OH}$ ,  $32.04 \text{ g mol}^{-1}$ ) for HPLC was purchased from Honeywell, South Korea.

## **Text S2. Characterizations**

The crystalline nature and structural deformation of the as-synthesized N-MWCNT were gathered using high resolution Raman spectroscopy (InVia Raman microscopes) and a powder X-ray diffractometer (XRD, D8 Advance Bruker) analysis. From the XRD results, the interlayer distance of the graphitic plane was determined by Bragg's equation,  $n\lambda = 2d\sin\theta$ , where  $\lambda$  is the incident wavelength ( $1.5406 \text{ \AA}$ ),  $\theta$  is the peak position,  $n$  is the order of diffraction (1), and  $d$  is the interlayer spacing or d-spacing value. The chemical entity, its composition, and the structural defects density of the carbocatalyst were analyzed with a K-Alpha TM X-ray photoelectron spectrometer (XPS) system (ThermoFisher Scientific, USA) and all the XPS spectra were fitted by XPSSEAK 41 software. The surface topography was analyzed with high resolution transmission electron microscopy (HR-TEM, JEOL JEM-2100F). The point of zero charge ( $\text{pH}_{\text{PZC}}$ ) of the carbon catalyst were measured using a zeta potential analyzer (ZetaPlus, Brookhaven, USA)

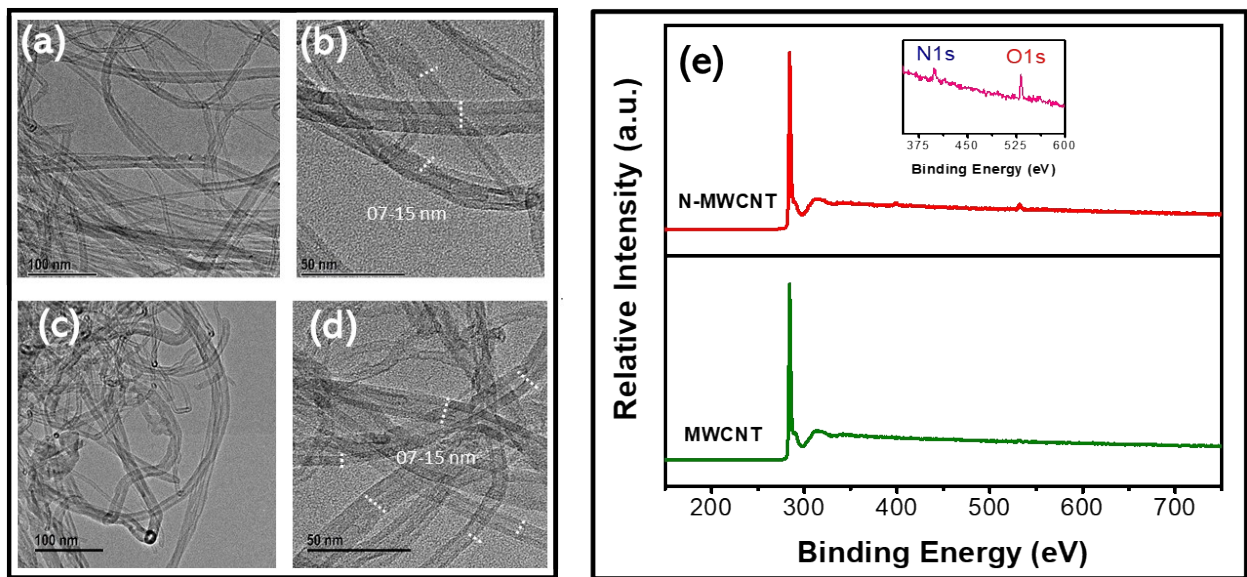

**Fig. S1.** HR-TEM images for pristine MWCNT (a, b) and N-MWCNT (c, d); (e) XPS full survey spectra of MWCNT and N-MWCNT, N 1s signal (Insert figure).

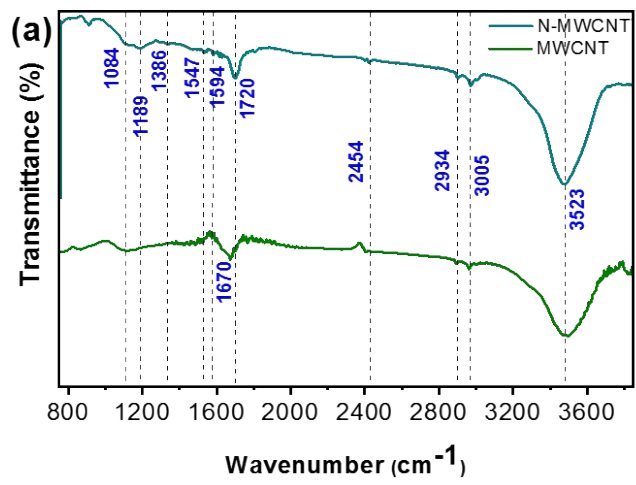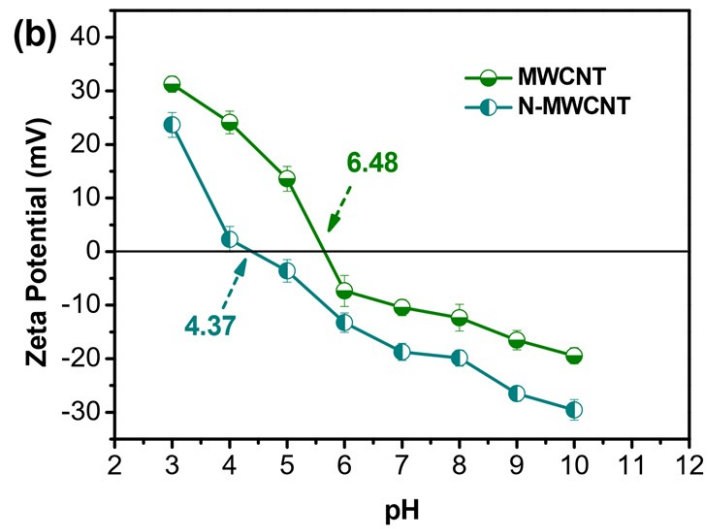

**Fig. S2.** FT-IR spectra and (b) Zeta potential of MWCNT and N-MWCNT under different pH conditions

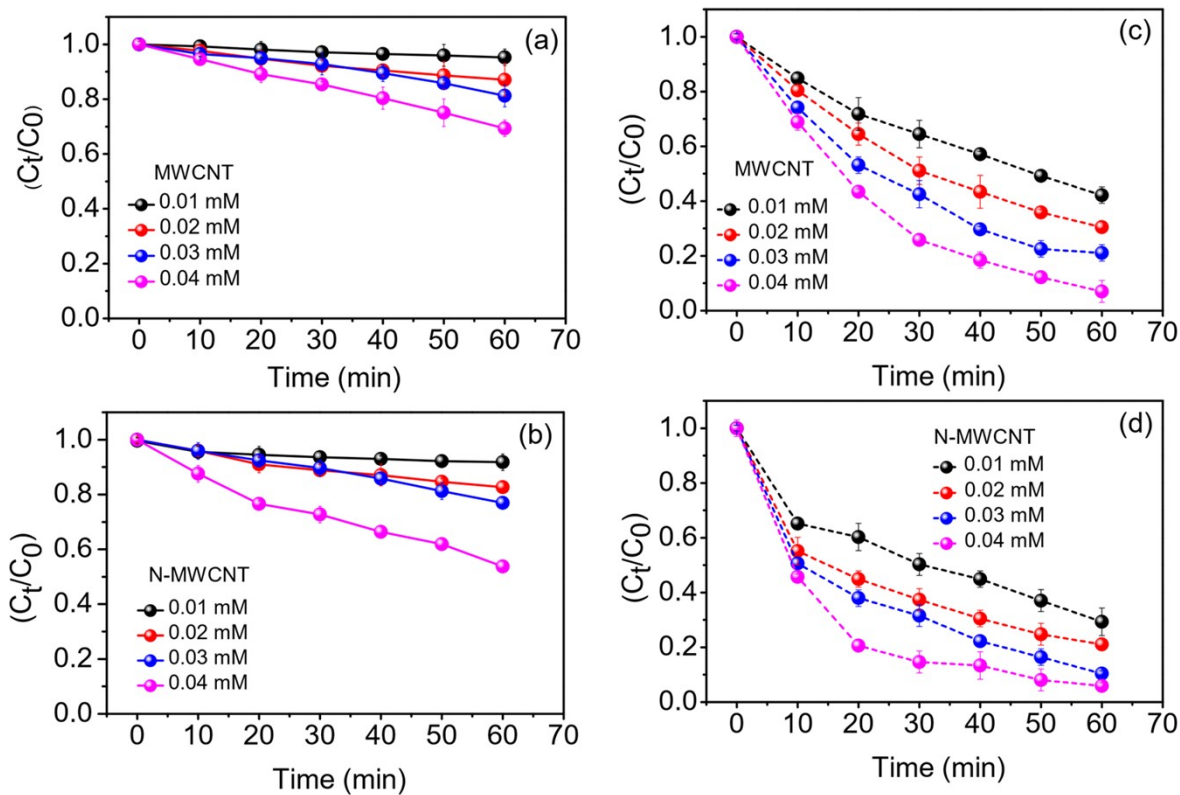

**Fig. S3.** Effect of PS dosage on normalized concentration of ACP (a, b) and normalized PS concentration (c, d). Experimental conditions were  $C_{\text{ACP}} = 10 \text{ mg L}^{-1}$ ,  $C_{\text{Catalyst}} = 100 \text{ mg L}^{-1}$ ,  $\text{pH}_i = 7.01 \pm 0.2$ , and  $C_{\text{PS}} = 0.01, 0.02, 0.03, \text{ and } 0.04 \text{ mM}$ .

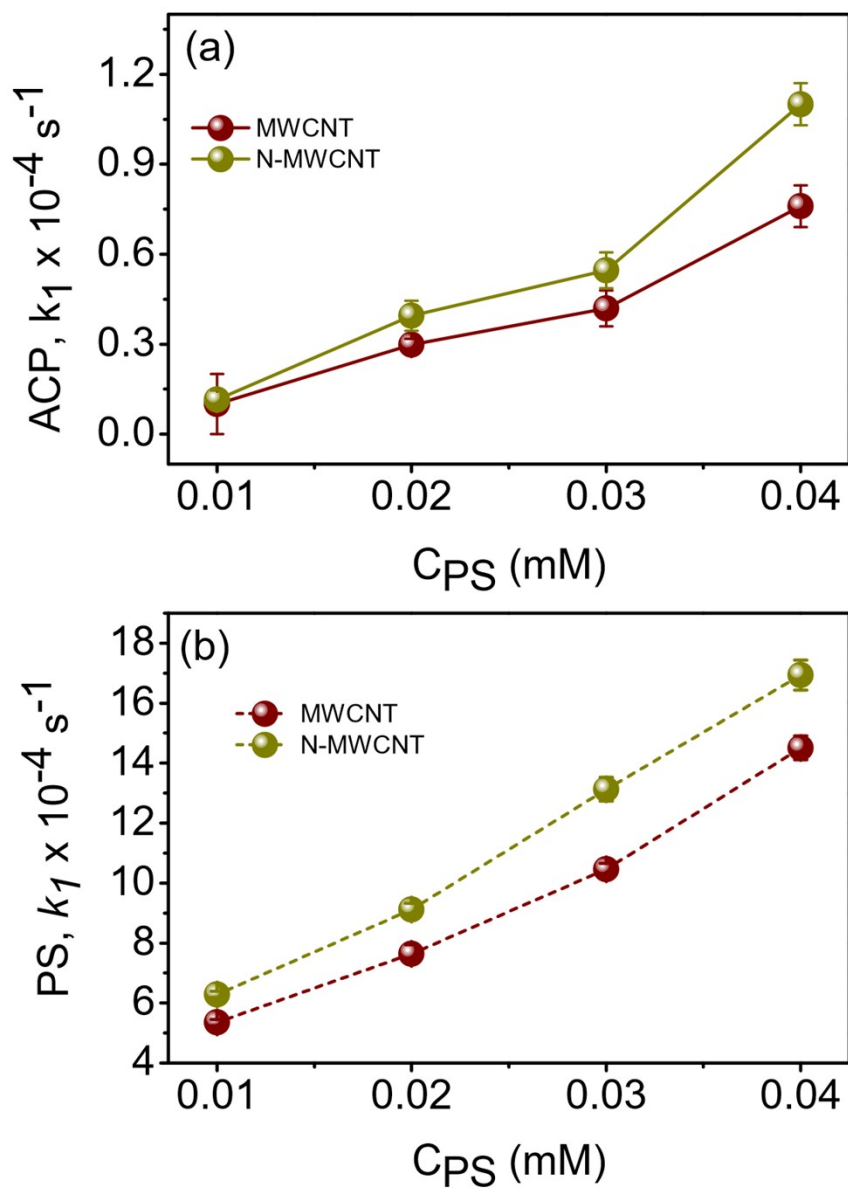

**Fig. S4.** Effect of PS dosage on ACP degradation rate constant and PS decomposition rate. Experimental conditions were  $C_{\text{ACP}} = 10 \text{ mg L}^{-1}$ ,  $C_{\text{Catalyst}} = 100 \text{ mg L}^{-1}$ ,  $\text{pH}_i = 7.01 \pm 0.2$ , and  $C_{\text{PS}} = 0.01, 0.02, 0.03, \text{ and } 0.04 \text{ mM}$ .

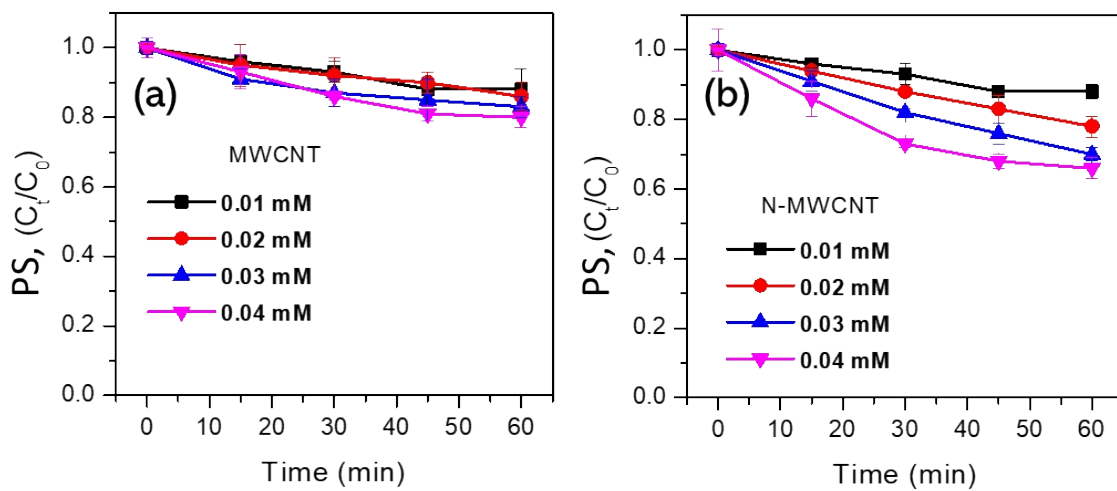

**Fig. S5.** PS adsorption efficiency at different PS dosage from (c) MWCNT/PS and (d) N-MWCNT/PS, without ACP. Experimental conditions were  $C_{\text{Catalyst}} = 100 \text{ mg L}^{-1}$ , and  $C_{\text{PS}} = 0.04 \text{ mM}$

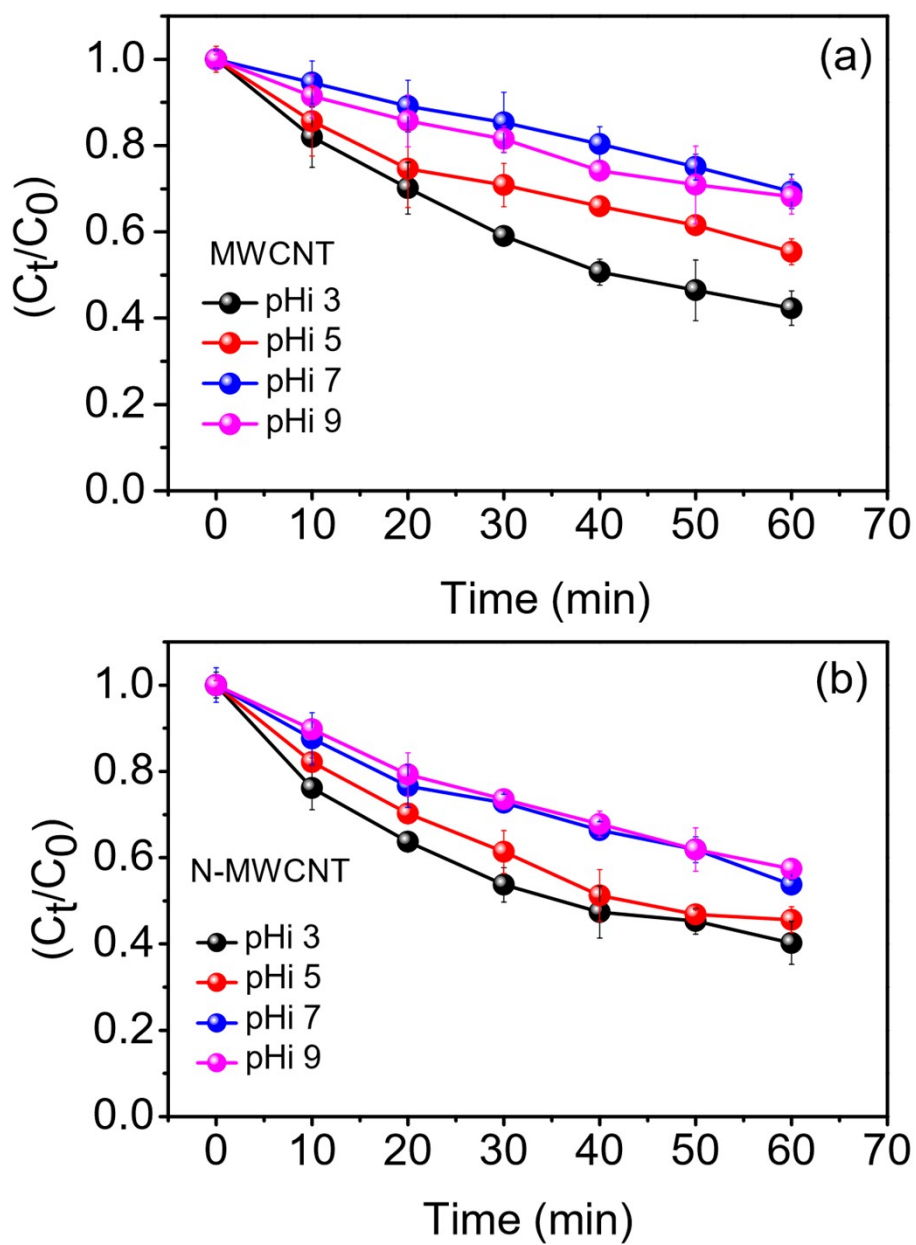



**Fig. S6.** Normalized concentration of ACP with different  $\text{pH}_i$  of the (a) MWCNT, (b) N-MWCNT catalytic system. Experimental conditions were  $C_{\text{ACP}} = 10 \text{ mg L}^{-1}$ ,  $C_{\text{Catalyst}} = 100 \text{ mg L}^{-1}$ , and  $C_{\text{PS}} = 0.04 \text{ mM}$ .

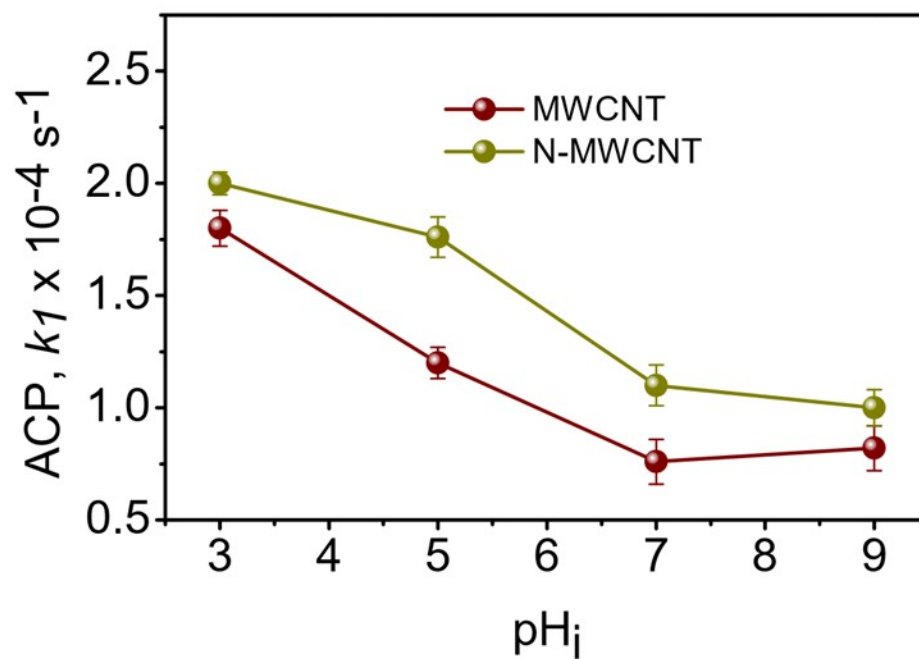

**Fig. S7** Effect of  $\text{pH}_i$  on ACP degradation rate constant. Experimental conditions were  $C_{\text{ACP}} = 10 \text{ mg L}^{-1}$ ,  $C_{\text{Catalyst}} = 100 \text{ mg L}^{-1}$ , and  $C_{\text{PS}} = 0.04 \text{ mM}$ .

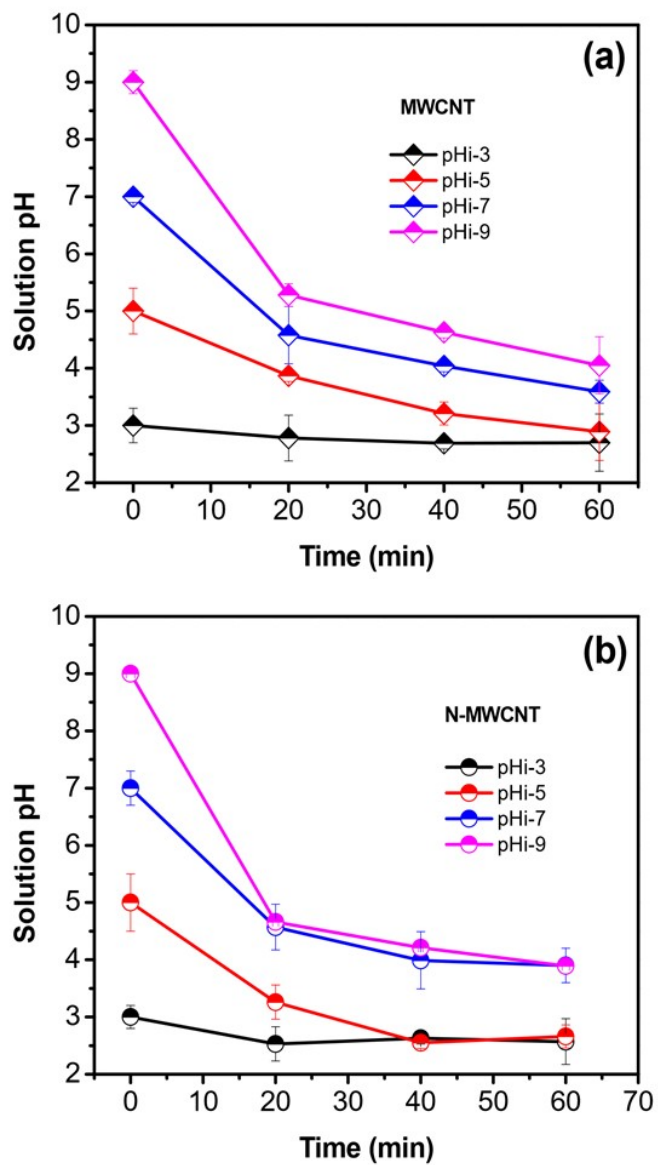

**Fig. S8.** Solution pH changes at different initial solution pH (a) MWCNT and (b) N-MWCNT

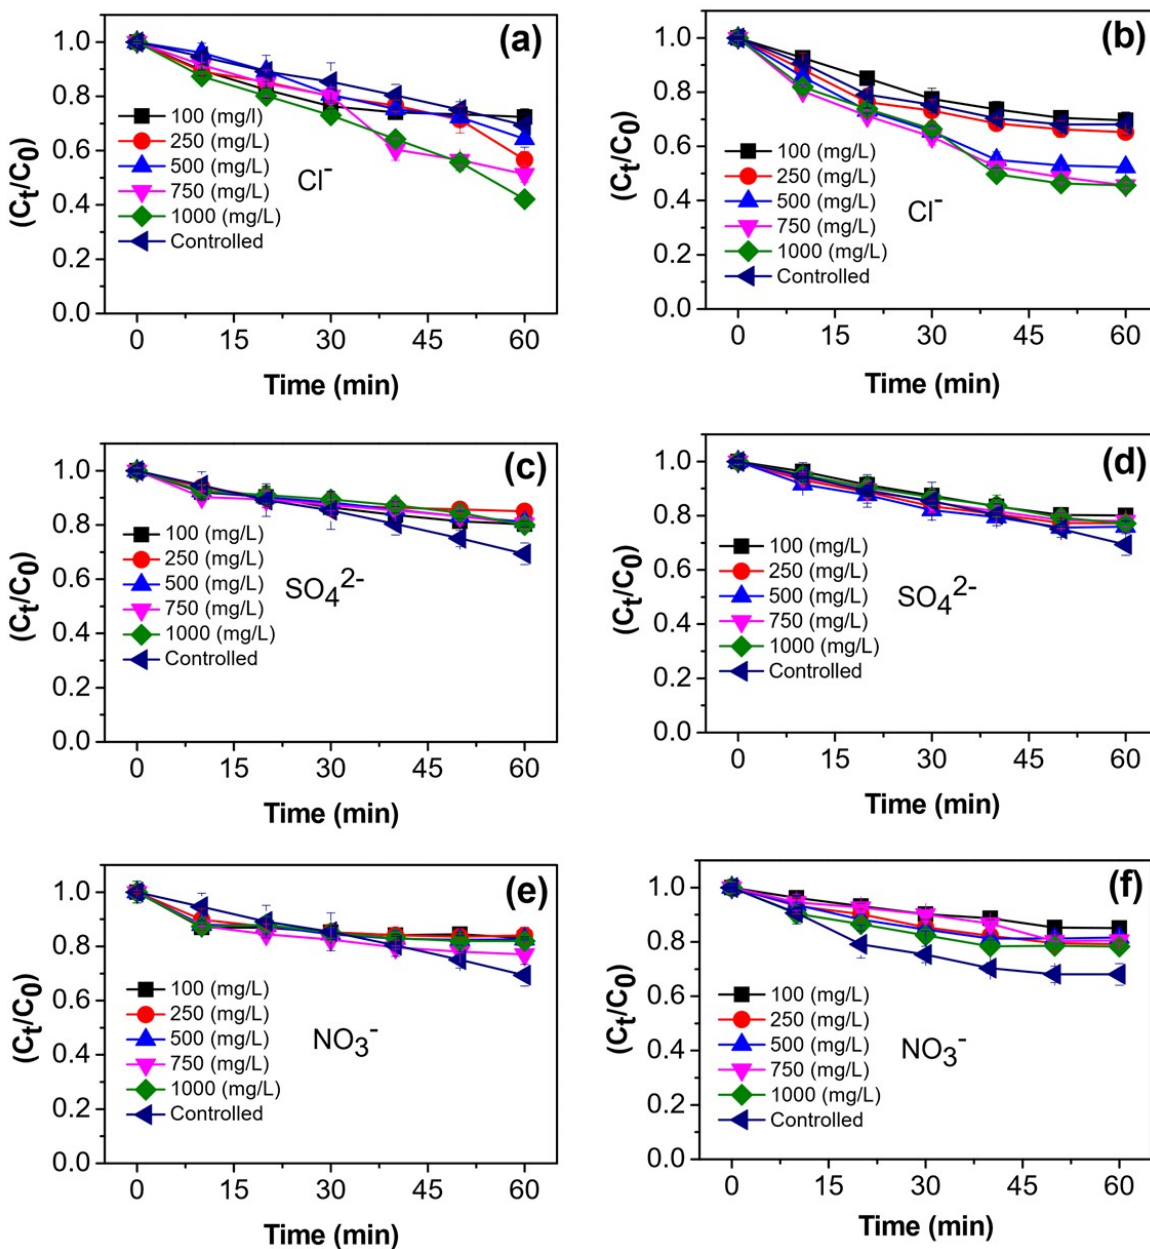

**Fig. S9.** Normalized concentration of ACP at MWCNT/PS (a, c, and e) and N-MWCNT/PS (b, d, and f) with different  $Cl^-$  (a-b),  $SO_4^{2-}$  (c-d), and  $NO_3^-$  (e-f) dosage. Experimental conditions were  $C_{ACP} = 10 \text{ mg L}^{-1}$ ,  $C_{Catalyst} = 100 \text{ mg L}^{-1}$ ,  $C_{PS} = 0.04 \text{ mM}$ ,  $C_{anions} = 100, 250, 500, 750, \text{ and } 1000 \text{ mg L}^{-1}$ , and  $pH_i = 7.01 \pm 0.2$ .

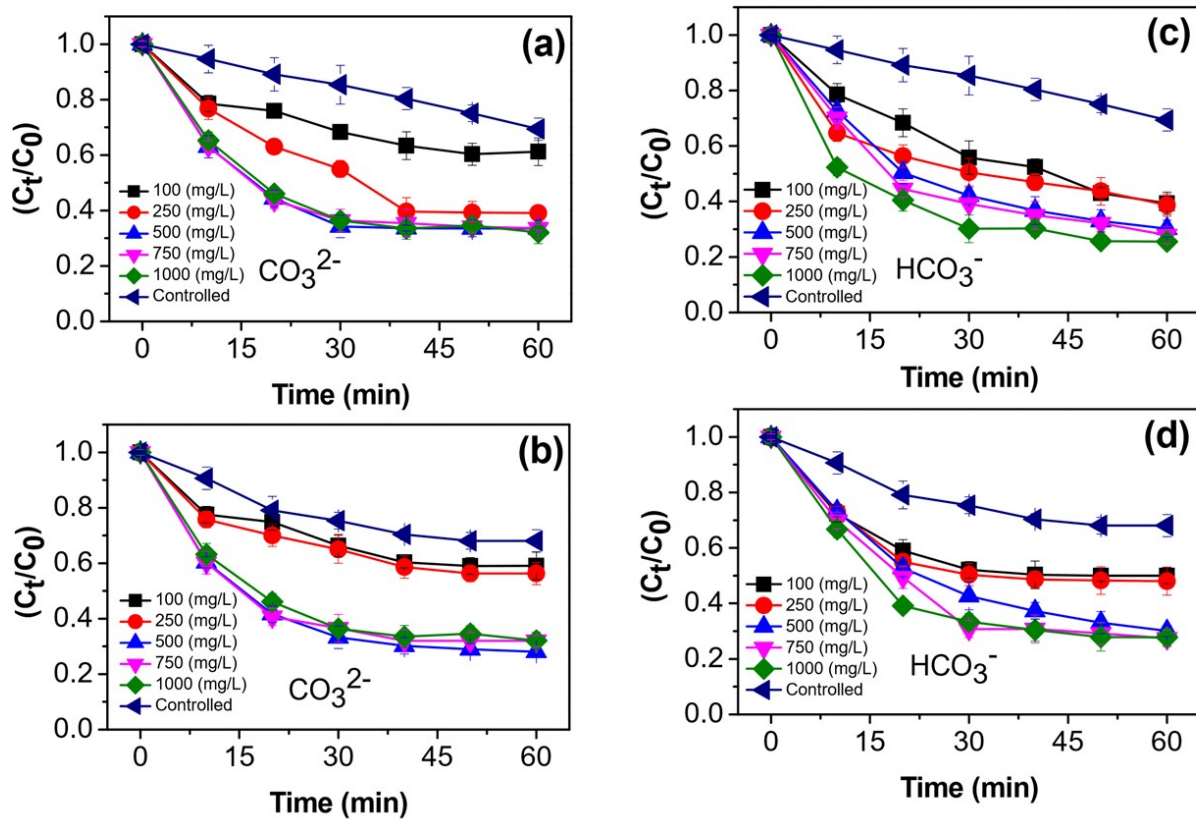

**Fig. S10.** Normalized concentration of ACP at MWCNT/PS (a and c) and N-MWCNT/PS (b and d) with different  $\text{CO}_3^{2-}$  (a-b) and  $\text{HCO}_3^-$  (c-d) dosage. Experimental conditions were  $C_{\text{ACP}} = 10 \text{ mg L}^{-1}$ ,  $C_{\text{Catalyst}} = 100 \text{ mg L}^{-1}$ ,  $C_{\text{PS}} = 0.04 \text{ mM}$ ,  $C_{\text{anions}} = 100, 250, 500, 750, \text{ and } 1000 \text{ mg L}^{-1}$ , and  $\text{pH}_i = 7.01 \pm 0.2$ .

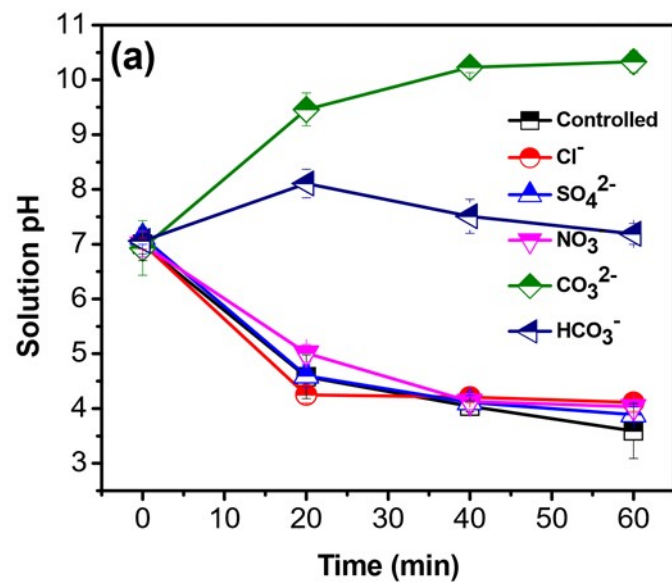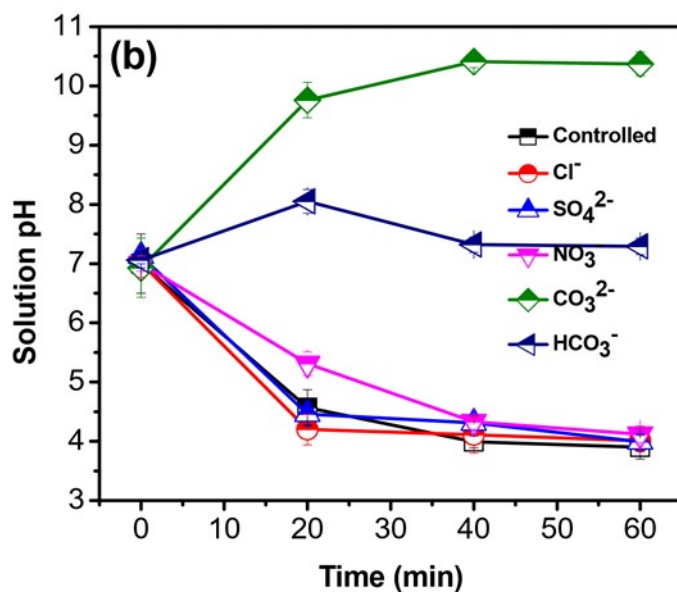

**Fig. S11.** Solution pH changes at co-existing anions conditions (a) MWCNT and (b) N-MWCNT. Experimental conditions were  $C_{\text{ACP}} = 10 \text{ mg L}^{-1}$ ,  $C_{\text{Catalyst}} = 100 \text{ mg L}^{-1}$ ,  $C_{\text{PS}} = 0.04 \text{ mM}$ ,  $C_{\text{anions}} = 500 \text{ mg L}^{-1}$ , and  $\text{pH}_i = 7.01 \pm 0.2$ .

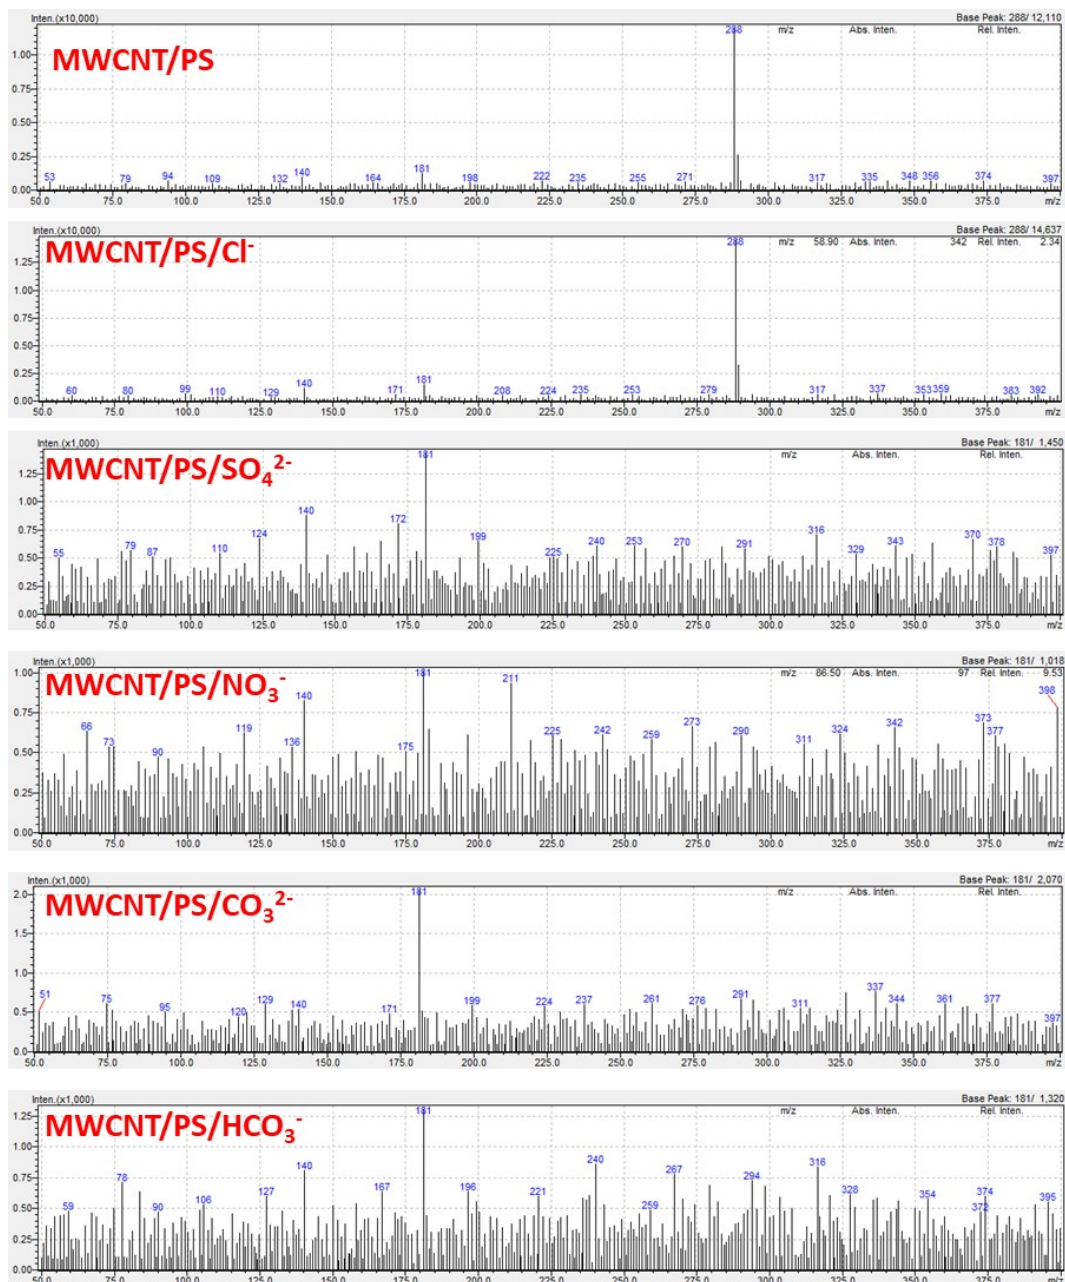

**Fig. S12.** LC-MS spectra obtained for different catalytic processes. Experimental conditions were  $C_{\text{Catalyst}} = 100 \text{ mg L}^{-1}$ ,  $C_{\text{ACP}} = 10 \text{ mg L}^{-1}$ ,  $C_{\text{PS}} = 0.04 \text{ mM}$ ,  $C_{\text{co-existing ion}} = 500 \text{ mg L}^{-1}$ , and  $\text{pH}_i = 7.01 \pm 0.2$ .

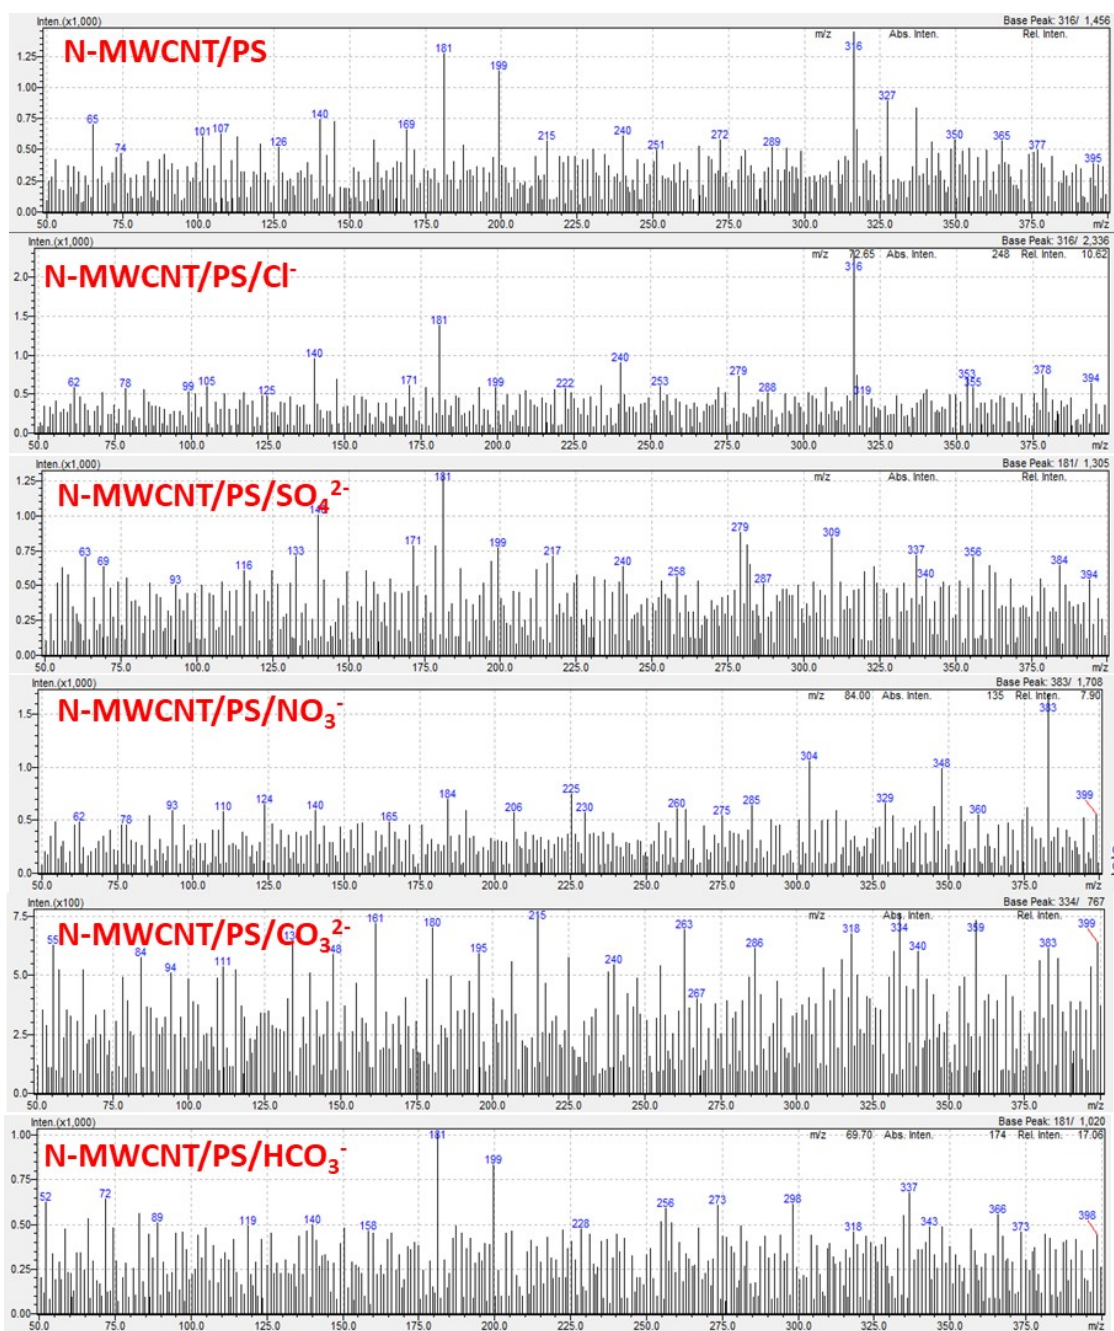

**Fig. S13.** LC-MS spectra obtained for different catalytic processes. Experimental conditions were  $C_{\text{Catalyst}} = 100 \text{ mg L}^{-1}$ ,  $C_{\text{ACP}} = 10 \text{ mg L}^{-1}$ ,  $C_{\text{PS}} = 0.04 \text{ mM}$ ,  $C_{\text{co-existing ion}} = 500 \text{ mg L}^{-1}$ , and  $\text{pH}_i = 7.01 \pm 0.2$ .

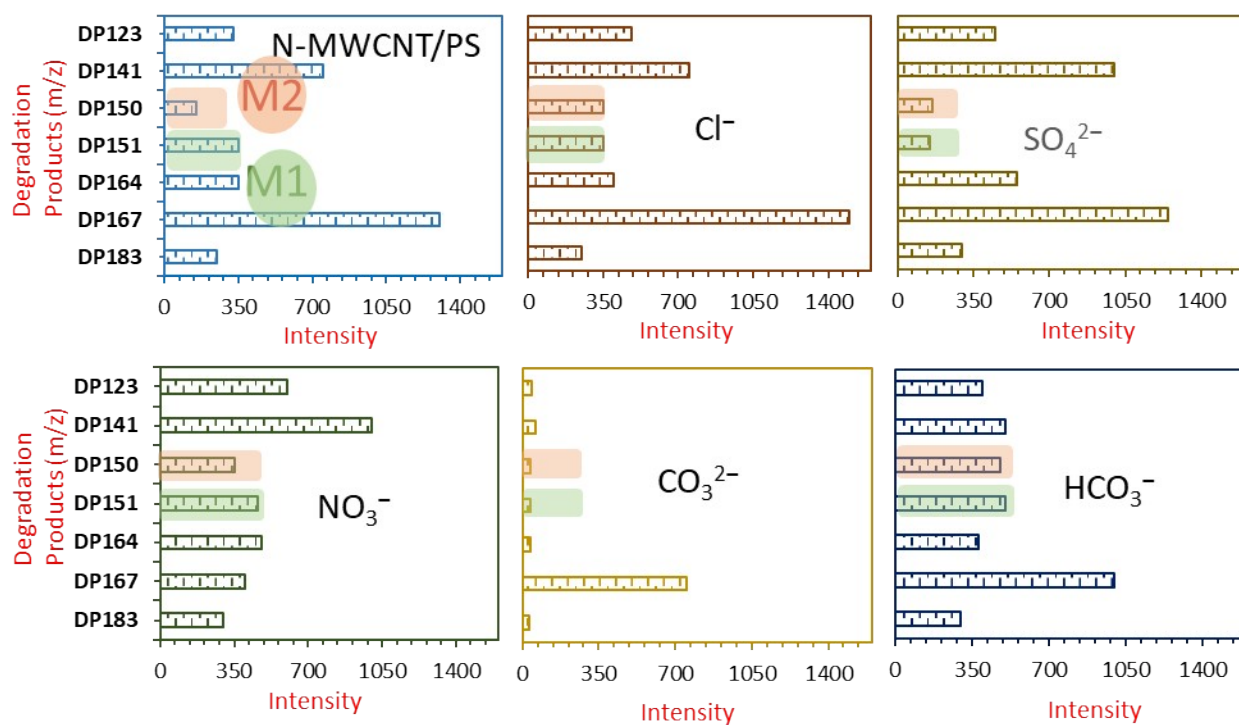

**Fig. S14.** Electron transfer initiated oxidative degradation products (m/z) by N-MWCNT/PS in the presence and absence of co-existing anions. Conditions:  $C_{\text{Catalyst}} = 100 \text{ mg L}^{-1}$ ,  $C_{\text{ACP}} = 10 \text{ mg L}^{-1}$ ,  $C_{\text{PS}} = 0.04 \text{ mM}$ ,  $C_{\text{co-existing ion}} = 500 \text{ mg L}^{-1}$ , and  $\text{pH}_i = 7.01 \pm 0.2$ .



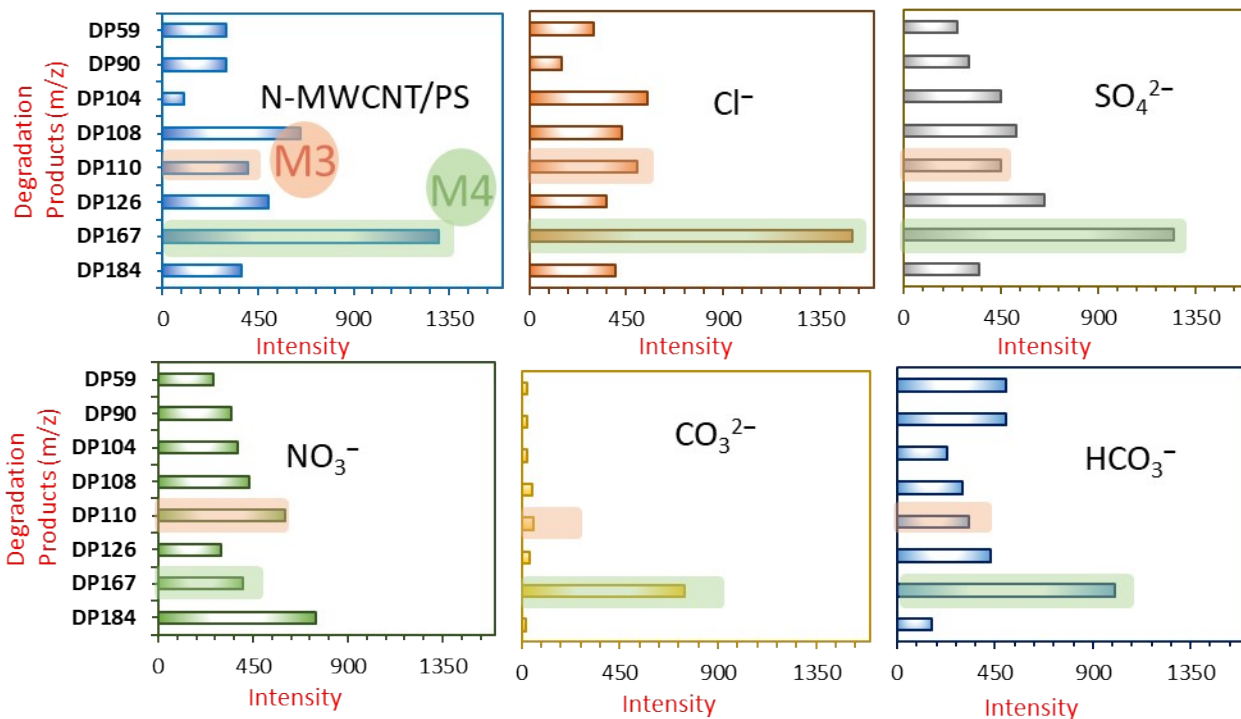

**Fig. S15.** Hydroxylation initiated oxidative degradation products (m/z) by N-MWCNT/PS in the presence and absence of co-existing anions. Conditions:  $C_{\text{Catalyst}} = 100 \text{ mg L}^{-1}$ ,  $C_{\text{ACP}} = 10 \text{ mg L}^{-1}$ ,  $C_{\text{PS}} = 0.04 \text{ mM}$ ,  $C_{\text{co-existing ion}} = 500 \text{ mg L}^{-1}$ , and  $\text{pH}_i = 7.01 \pm 0.2$ .

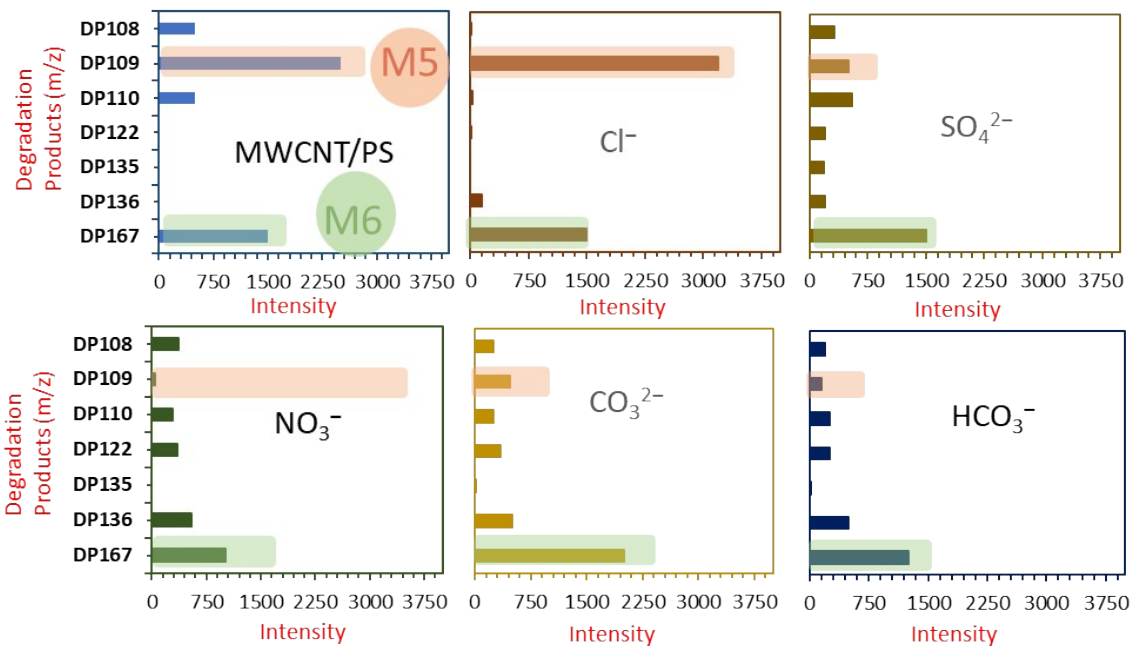

**Fig. S16.** Hydroxylation and ring opening oxidative degradation products (m/z) by MWCNT/PS in the presence and absence of co-existing anions. Conditions:  $C_{\text{Catalyst}} = 100 \text{ mg L}^{-1}$ ,  $C_{\text{ACP}} = 10 \text{ mg L}^{-1}$ ,  $C_{\text{PS}} = 0.04 \text{ mM}$ ,  $C_{\text{co-existing ion}} = 500 \text{ mg L}^{-1}$ , and  $\text{pH}_i = 7.01 \pm 0.2$ .

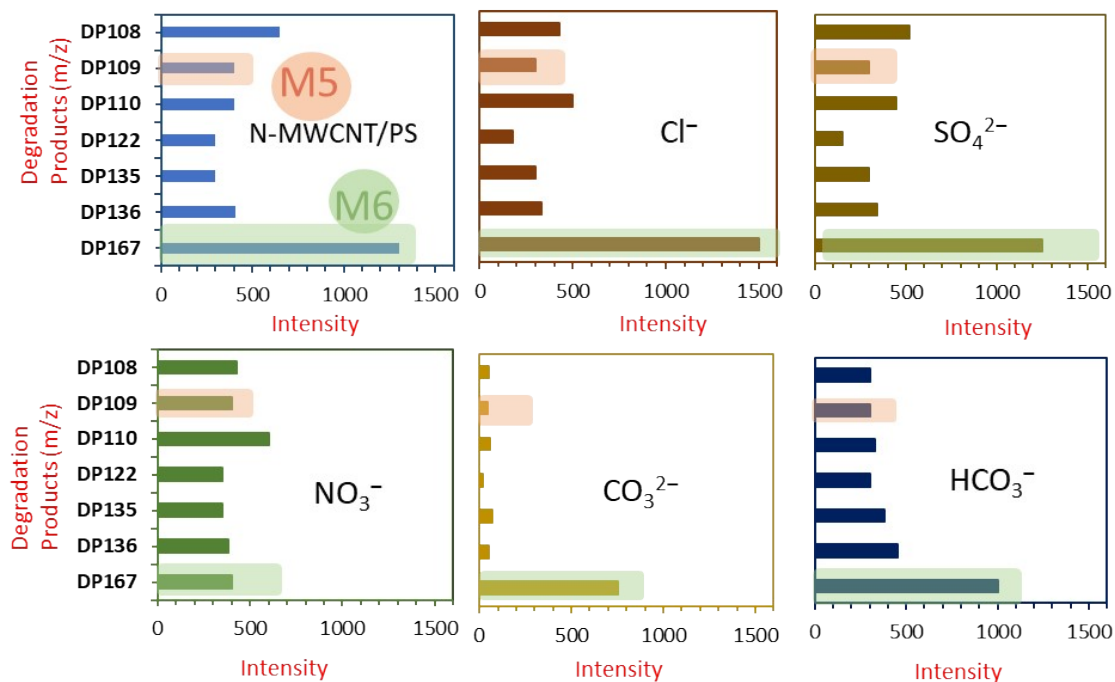

**Fig. S17.** Hydroxylation and ring opening oxidative degradation products (m/z) by N-MWCNT/PS in the presence and absence of co-existing anions. Conditions:  $C_{\text{Catalyst}} = 100 \text{ mg L}^{-1}$ ,  $C_{\text{ACP}} = 10 \text{ mg L}^{-1}$ ,  $C_{\text{PS}} = 0.04 \text{ mM}$ ,  $C_{\text{co-existing ion}} = 500 \text{ mg L}^{-1}$ , and  $\text{pH}_i = 7.01 \pm 0.2$ .
